# Supplementary material for: Real-world effectiveness of Azvudine in hospitalized patients with COVID-19: a retrospective cohort study
Source: bioRxiv or medRxiv preprint supplement (doi:10.1101/2023.01.23.23284899), 2023-01-23
Supplement: Supplementary file [file media-1.pdf]

## Supplementary Materials for

### **Real-world effectiveness of Azvudine in hospitalized patients with**

### **COVID-19: a retrospective cohort study**

Minxue Shen<sup>1-6#</sup>, Chenggen Xiao<sup>7#</sup>, Yuming Sun<sup>8#</sup>, Daishi Li<sup>1-5#</sup>, Ping Wu<sup>7#</sup>, Liping Jing<sup>1-5</sup>, Qingrong Wu<sup>1-5</sup>, Yating Dian<sup>1-5</sup>, Yu Meng<sup>1-5</sup>, Furong Zeng<sup>9\*</sup>, Xiang Chen<sup>1-5\*</sup>,  
Guangtong Deng<sup>1-5\*</sup>

Correspondence to: [dengguangtong@outlook.com](mailto:dengguangtong@outlook.com);

#### **This PDF file includes:**

Figures. S1 to S2

Tables S1

**Figure. S1.**

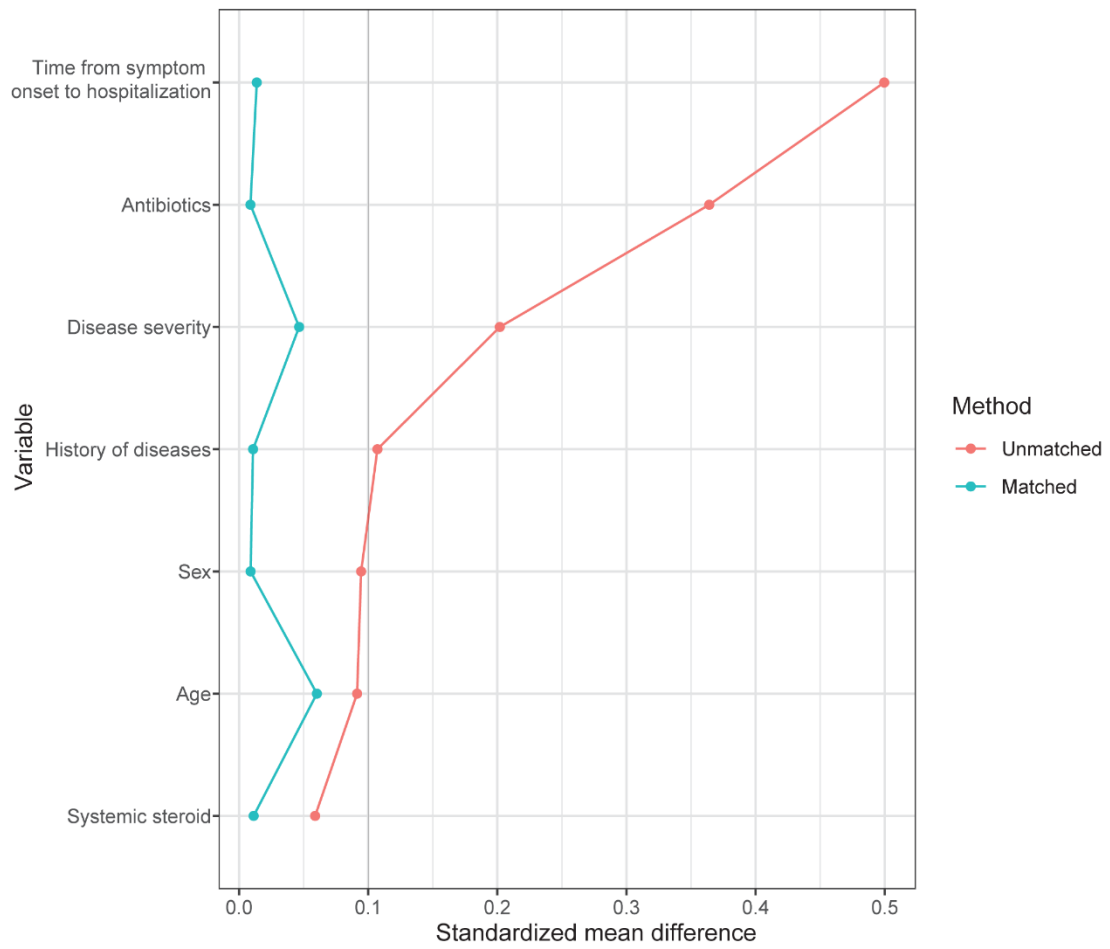

Standard mean differences between the groups before and after 1:1 propensity score-matching.

**Figure. S2.**

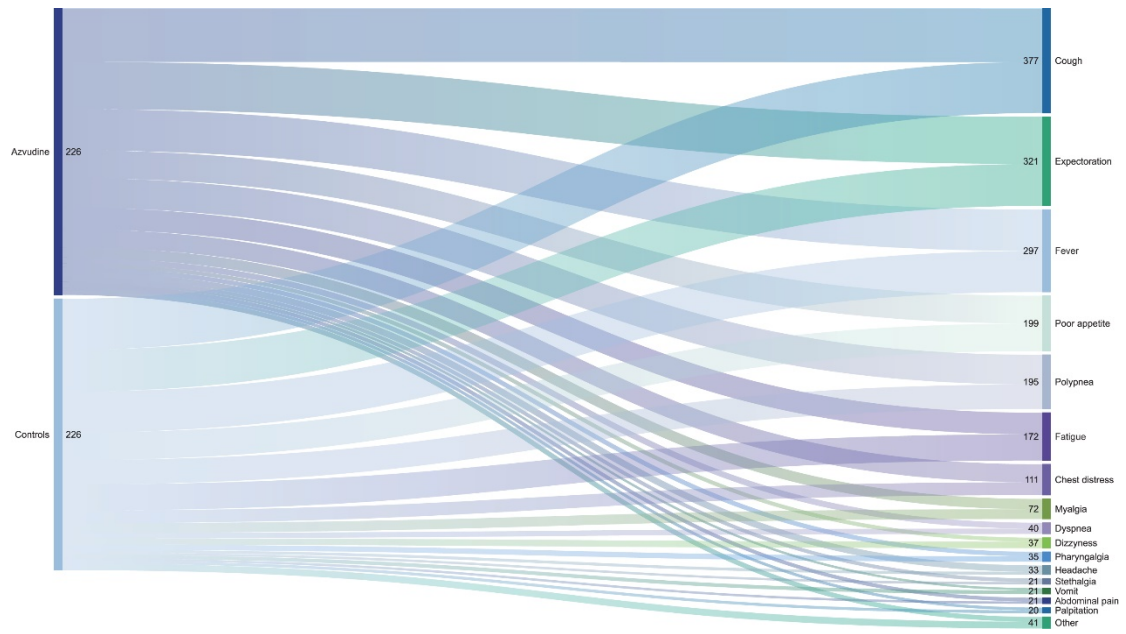

Frequency of symptoms between Azvudine recipients and matched controls.

**Table S1. Laboratory parameters between the two groups.**

| Category                    | Indicator                          | Azvudine        |       | Control |       |
|-----------------------------|------------------------------------|-----------------|-------|---------|-------|
|                             |                                    | Mean            | SD    | Mean    | SD    |
| Arterial blood gas analysis | PaO <sub>2</sub>                   | 108.4           | 46.7  | 108.0   | 53.7  |
|                             | PaCO <sub>2</sub>                  | 36.0            | 7.0   | 36.4    | 7.6   |
|                             | PaO <sub>2</sub> /FiO <sub>2</sub> | 388.4           | 173.6 | 379.5   | 181.3 |
| Blood cell count            | Red blood cell                     | 4.1             | 0.6   | 6.9     | 34.2  |
|                             | Hemoglobin                         | 128.4           | 76.0  | 118.1   | 19.3  |
|                             | White blood cell                   | 6.2             | 2.9   | 6.3     | 2.9   |
|                             | Blood platelet                     | 228.8           | 289.7 | 233.4   | 104.2 |
|                             | Lymphocyte                         | 1.1             | 0.6   | 1.2     | 1.2   |
|                             | Lymphocyte (%)                     | 20.8            | 10.9  | 20.6    | 11.5  |
|                             | Neutrophil                         | 4.6             | 4.1   | 5.1     | 6.8   |
|                             | Neutrophil (%)                     | 68.3            | 12.6  | 68.2    | 14.3  |
|                             | Eosinophil                         | 0.1             | 0.2   | 0.1     | 0.2   |
|                             | Basophil                           | 0.0             | 0.1   | 0.0     | 0.2   |
|                             | Liver, renal, and cardiac function | Total bilirubin | 10.8  | 4.5     | 11.8  |
| Direct bilirubin            |                                    | 3.9             | 1.7   | 4.8     | 14.3  |
| Albumin                     |                                    | 35.3            | 4.1   | 34.7    | 4.5   |
| Globulin                    |                                    | 28.3            | 4.5   | 28.7    | 4.9   |
| ALT                         |                                    | 31.8            | 29.8  | 32.3    | 27.2  |
| AST                         |                                    | 30.6            | 18.8  | 34.8    | 30.5  |
| Blood creatinine            |                                    | 89.2            | 114.7 | 113.2   | 156.2 |
| Blood urea nitrogen         |                                    | 6.4             | 5.2   | 7.3     | 5.7   |
| K <sup>+</sup>              | 4.0                                | 0.8             | 4.0   | 0.5     |       |

|             |                           |       |        |        |        |
|-------------|---------------------------|-------|--------|--------|--------|
|             | Ca <sup>2+</sup>          | 2.2   | 1.2    | 2.1    | 0.1    |
|             | Na <sup>+</sup>           | 145.6 | 86.2   | 144.9  | 84.8   |
|             | Cl <sup>-</sup>           | 103.6 | 6.7    | 152.8  | 668.1  |
|             | Mg <sup>2+</sup>          | 1.4   | 6.7    | 0.8    | 0.1    |
|             | Lactic dehydrogenase      | 228.5 | 81.0   | 220.9  | 96.1   |
|             | Creatine kinase           | 102.9 | 180.7  | 141.7  | 449.7  |
|             | creatine kinase MB        | 11.9  | 10.3   | 10.4   | 5.8    |
|             | Myohemoglobin             | 80.6  | 100.9  | 132.6  | 432.1  |
|             | Troponin                  | 3.4   | 40.2   | 2.1    | 22.6   |
|             | Brain natriuretic peptide | 609.0 | 1556.3 | 1431.7 | 4457.2 |
| Coagulation | D-Dimer                   | 0.3   | 0.9    | 0.5    | 1.7    |
|             | PT                        | 12.1  | 2.6    | 12.2   | 2.6    |
|             | INR                       | 1.0   | 0.3    | 1.0    | 0.2    |
|             | Fibrinogen                | 4.4   | 1.5    | 4.6    | 1.8    |
|             | APTT                      | 27.5  | 4.2    | 28.5   | 6.8    |
|             | TT                        | 16.6  | 4.9    | 16.4   | 1.9    |
| Cytokines   | TNF- $\alpha$             | 10.0  | 6.3    | 8.4    | 7.4    |
|             | Interferon- $\gamma$      | 2.5   | 0.0    | 5.4    | 2.3    |
|             | IL-2                      | 1.9   | 1.0    | 1.9    | 1.1    |
|             | IL-4                      | 2.5   | 0.0    | 2.5    | 0.0    |
|             | IL-6                      | 19.6  | 32.9   | 34.2   | 133.6  |
|             | IL-10                     | 6.3   | 7.9    | 5.9    | 14.3   |
|             | IL-17A                    | 1.7   | 0.0    | 1.4    | 0.5    |
| Other       | HbA <sub>1c</sub>         | 6.7   | 1.3    | 6.5    | 1.6    |
|             | Lactic acid               | 1.6   | 0.7    | 1.9    | 1.2    |
|             | Procalcitonin             | 0.3   | 1.8    | 1.7    | 14.9   |

---

|                                |       |       |       |       |
|--------------------------------|-------|-------|-------|-------|
| C-reactive protein             | 42.2  | 51.9  | 38.0  | 47.7  |
| Erythrocyte sedimentation rate | 54.1  | 26.9  | 58.2  | 29.3  |
| Ferritin                       | 791.2 | 544.0 | 575.7 | 487.3 |

---

SD, standard deviation.
